# Supplementary material
Source: Springer Nature journal article supplement (https://www.springermedizin.de/resource/supplementary/12885_2014_4997_MOESM4_ESM.pdf/9467968)

**A****Control group**

Before treatment

After treatment

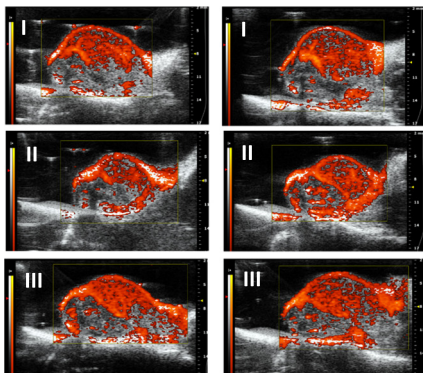**Treatment group**

Before treatment

After treatment

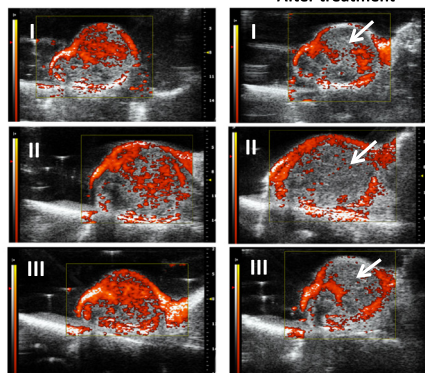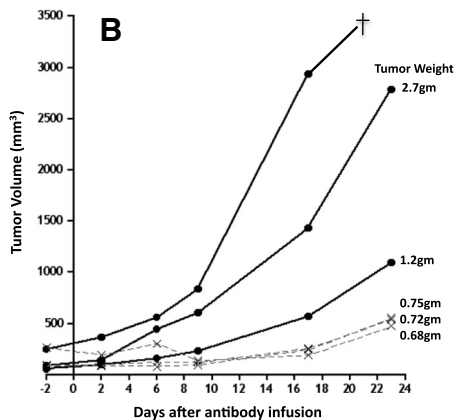

Supplement: MOESM4 [file 9467968]
